# Supplementary material
Source: publisher figshare collection journal article supplement (https://tandf.figshare.com/ndownloader/files/13205888)
Supplement: Supplementary file 1 [file 13205888]

| **Supplement Material**. Original English version of the measures and Brazilian translation | |  | |
| --- | --- | --- | --- |
| **Original version** | **Translated version** | |
| **COPE**  1. *Refused to lend him money or to help him out financial in other ways?*  2. *Put the interests of other members of the family before hers?*  3. *Put yourself out for him, for example by getting him to bed or by clearing up mess after him after he had been drinking?*  4.*Given him money even when you thought*  *it would be spent on drink?* | Recusado ou negado a emprestá-lo(a) dinheiro ou ajudá-lo(a) financeiramente de outras maneiras?  Priorizado os interesses de outros membros da familia antes do dependente químico?  Ajudado sempre, por exemplo, colocado ele(a) na cama ou limpado a bagunça deixada por ele(a) depois de ter bebido ou usado drogas?  Dado dinheiro para ele(a) mesmo sabendo que seria gasto com bebida ou drogas? | |
| 5. *Sat down together with him and talked frankly abut what could be done about his drinking?*  6. *Started an argument with him about his drinking?*  *7. Pleaded with him about his consumption of alcohol?*  *8. When he was under the influence of drink, left him alone to look after himself or kept out of his way?* | Sentado com ele(a) para conversar sobre o que poderia ser feito quanto ao seu hábito de beber ou se drogar?  Começado uma discussão sobre o fato de ele(a) beber ou se drogar?  Suplicado sobre seu consumo de álcool ou dogras?  Quando ele(a) estava sob a influencia da bebida, você o deixou sozinho(a) para cuidar de si mesmo ou seguir o seu próprio caminho das drogas? | |
| 9. *Made it quite clear to him that his drinking was causing you upset and that it had got to change?*  10. *Felt too frightened to do anything?* | Deixou claro que a bebedeira ou o efeito das drogas dele(a) estava te deixando preocupado(a) e isso tinha que mudar?  Teve medo de fazer alguma coisa? | |
| 11. *Tried to limit his drinking by making some rule about it, for example forbidding drinking in the house, or stopping him bringing drinking friends home?*  12. *Pursued your own interests or looked for new interests or occupation for yourself, or got more involved in a political, church, sports or other organisation?* | Tentou colocar regras para limitar seu consumo da bebida ou das drogas, como, esconder a bebida em algum lugar ou proibi-lo(la) de trazer amigos para casa que bebiam ou faziam uso de drogas?  Tido seus próprios interesses ou procurado por novos, ou alguma ocupação para você, ou se envolveu em politica, igreja, esportes ou outra organização? | |
| 13. *Encouraged him to take an oath or promise not to drink?)*  14. *Felt too hopeless to do anything?*  *15. Avoided him as much as possible because of his drinking?*  16. *Got moody or emotional with him?*  17. *Watched his every move or checked up on him or kept a close eye on him?*  18*. Got on with your own things or acted as if he wasn’t there?* | Você o(a) incentivou a jurar ou prometer nunca mais beber ou a se drogar?  Sentiu-se sem esperança para fazer alguma coisa?  Evitava ele(a) o máximo possível por causa da bebida/uso de drogas?  Ficava temperamental, ou tinha mudanças de humor, ou emocional com ele(a)?  Ficava de olho em cada passo dele(a) ou o(a) checava o tempo todo ou ficava sempre atento?  Cuidava de suas coisas ou agia como se ele não estive perto? | |
| 19. *Made it clear that you won’t accept his reasons for drinking, or cover up for him?)* | Você deixou claro que não aceitaria seus motivos por beber ou usar drogas ou tentou encobri-lo(la)? | |
| *20. Made threats that you didn’t really mean to carry out?*  *21. Made clear to him your expectations of what he should do to contribute to the family?)*  *22. Stuck up for him or stood by him when others were criticising him?* | Fez ameaças dizendo que não queria continuar assim?  Deixou claro para ele(a) suas expectativas de como ele(a) deveria agir para contribuir com a família?  Ficou do seu lado ou ele(a) apoiou quando outros o(a) criticaram? | |
| *23. Got in a state where you didn’t or couldn’t make any decision?*  *24. Accepted the situation as a part of life that couldn’t be changed?*  *25. Accused him of not loving you, or of letting you down?*  *26. Sat down with him to help him sort out the financial situation?* | Ficou num estado onde você não podia e nem conseguia tomar qualquer decisão?  Aceitou a situação como parte da vida e que não podia ser mudada?  Acusado, ou culpado(a) ele(a) de não te amar ou de tê-lo(la) decepcionado(a)?  Sentado com ele(a) e o (a) ajudado a resolver a situação financeira? | |
| 27. *When things have happened as a result of his drinking, made excuses for him, covered up for him, or taken the blame yourself?*  28. *Searched for his drink or hidden or disposed of it yourself?*  29. *Sometimes put yourself first by looking after yourself or giving yourself treats?* | Quando coisas aconteceram como resultados da bebida ou das drogas, você justificou por ele(a), ou o(a) defendeu e o(a) encobriu, ou tomou a culpa para si?  Procurou pela bebida ou droga, escondeu ou você mesmo jogou fora?  Algumas vezes se colocou em 1 lugar, se cuidando ou lhe dando alguns prazeres? | |
| 30. *Tried to keep things looking normal, pretended all was well when it wasn’t or hidden the extent of his drinking?* | Tentou manter as coisas parecerem normais, fez de conta que tudo estava bem quando não estava ou escondia o grau do quanto ele(a) bebia ou se drogava? | |
| **HOPE** |  | |
| *1. I am now starting to anticipate a new future*  *2. I’m fearful about how my relative will get on*  *3. S/he isn’t looking at things seriously enough*  *4. I’m pessimistic about the immediate future*  *5. I believe something good will come out of this for him/her*  *6. There’s never going to be any change, s/he’s stuck*  *7. I worry that s/he will use till the end*  *8. Things are beginning to pick up*  *9. I’m starting to get back the person I know*  *10. I feel more positive about things* | Estou agora começando antecipar um novo futuro.  Estou temoroso(a) sobre como meu parente vai prosseguir  Meu parente não está encarando as coisas com suficiente seriedade  Estou pessimista em relação ao future imediato.  Eu acredito que alguma coisa realmente boa virá para ele(a)  Nunca haverá nenhuma mudança, meu parente está no mesmo lugar  Temo que meu parente vá beber e se drogar até o fim  As coisas estão começando a melhorar  Estou começando a ter de volta a pessoa que conheci.  Eu sinto mais positiva sobre as coisas agora. | |
| **FMI**  *1. Does your relative have very changeable moods?*  *2. Does your relative communicate badly?)*  *3.**Does your relative steal or borrow money and not pay it back?)*  *4. Have the family’s finances been affected?)*  5. *Does your relative pick quarrels with you?*  6. *Has your relative sometimes threatened you?)*  7. *Have people outside the family had to get involved?*  *8. Does your relative come and go at irregular or awkward times?)*  9. *Does your relative’s drinking/drug use get in the way of your social life?)*  *10. Has your relative upset family occasions?*  *11. Does your relative fail to join in Family activities?*  12. *Has your relative been late or unreliable?*  *13. Are you worried that your relativ’s ability to work or study has been affected by the drinking/drug use?)*  *14. Are you worried that your relative’s physical health has been affected by the drinking/drug use?*  *15. Are you worried that your relative has neglected his/her appearance or self-care?*  *16. Are you worried that your relative’s mental state is becoming affected by the drinking/drug use?*  **SRT**  *1. Feeling dizzy or faint*  *2. Feeling tired or lack of energy*  *3. Feeling nervous*  *4. Feeling pressure or tightness in the head*  *5. Feeling scared or frightened*  *6. Poor appetite*  *7. Heart beating quickly or strongly without reason throbbing or pounding*  8.*Feeling that there was no hope*  *9. Restless or jumpy*  *10. Poor memory*  *11. Chest pains or breathing difficulties or feeling of not having enough air*  *12. Feeling guilty*  *13. Worrying*  *14. Muscle pains, aches or rheumatism*  *15. Feeling that people look down on you or think badly of you*  *16. Trembling or shaking*  *17. Difficulty in thinking clearly or difficulty in making up your mind*  *18. Feeling unworthy or a failure*  *19. Feeling tense or ‘wound up’*  *20. Feeling inferior to other people*  *21. Parts of your body feel numb or tingling*  *22. Irritable*  *23. Thoughts that you cannot push out of your mind*  *24. Lost interest in most things*  *25. Unhappy or depressed*  *26. Attacks of panic*  *27. Parts of the body feel weak*  *28. Cannot concentrate*  *29. It takes a long time to fall asleep, or restless sleep, or nightmares*  *30. Awakening early and not being able to fall asleep again* | O seu parente tem muitas mudanças de humor?  O seu parente não se comunica bem?  O seu parente rouba ou empresta dinheiro e não paga de volta?  A parte financeira da família tem sido afetadas?  O seu parente briga com você?  O seu parente já o ameaçou?  Pessoas de fora da sua família já tiveram que se envolver?  O seu parente entra e sai de casa em horários irregulares ou estranhos?  O uso de álcool/drogas de seu parente atrapalha ou incomoda sua vida social?  O seu parente já incomodou eventos da família?  O seu parente negou ou se recusou a participar das atividades familiares?  O seu parente se atrasa ou não é confiável?  Você está preocupado(a) que a habilidade do seu parente em trabalhar ou estudar tenham sido afetados pelo uso de álcool/drogas?  Você está preocupado(a) que a saúde física do seu parente esta sendo afetada pelo uso de drogas/bebidas?  Você está preocupado(a) que seu parente tem negligenciado sua aparência e cuidados?  Você está preocupado(a) que a saúde mental do seu parente esta sendo afetada pelo uso de drogas/bebidas?  Tontura ou desmaio.  Cansaço ou falta de energia  Nervosismo.  Pressão ou peso na cabeça.  Medo ou susto  Pouco apetite.  Coração bater forte ou rapidamente sem motivo (latejando ou pulsando  Sentir que não há esperança.  Agitada ou nervosa.  Memória fraca.  Dores no peito ou dificuldade para respirar ou sentir falta de ar.  Culpa.  Preocupação  Dores musculares, dores ou reumatismo  Sentir que as pessoas tem pena de você ou pensem mal de você.  Tremores ou agitações.  Dificuldade em pensar claramente ou dificuldade em tomar decisões.  Sentir sem valor ou fracasso  Tensa ou machucada.  Inferioridade em relação a outras pessoas  Partes de seu corpo parecem anestesiadas ou formigando.  Irritada  Pensamentos que você não consegue tirar da cabeça.  Perda de interesse em muitas coisas.  Infeliz ou deprimida.  Ataques de pânico.  Fraqueza em partes do corpo.  Não consegue concentrar-se.  Leva muito tempo para dormir, ou sono inquieto, ou pesadelos  Acordar cedo e não conseguir dormir novamente | |
